# Supplementary material for: Beneficial Endophytic Bacteria-Serendipita indica Interaction for Crop Enhancement and Resistance to Phytopathogens
Source: Front Microbiol. 2019 Dec 19;10:2888. doi: 10.3389/fmicb.2019.02888 (PMC6930893; doi:10.3389/fmicb.2019.02888)
Supplement: Supplementary file 2 [file Data_Sheet_1.xlsx]

## Sheet: Table Supp.
Suppl. Table 1
Analysis of antimicrobial resistance or virulence genes with ABRicate v0.8.10
Strain	GENE	SEQUENCE	START	END	COVERAGE	%COVERAGE	%IDENTITY	DATABASE	ACCESSION	PRODUCT
P1-5	mtrA	NODE_11	72620	73306	1-687/687	100.00	84.42	card	AL123456.3:3626663-3627350	MtrA is a transcriptional activator of the MtrCDE multidrug efflux pump of Neisseria gonorrhoeae.
	efpA	NODE_1	133895	135371	113-1592/1593	92.66	78.46	card	NC_000962.3:3153039-3154632	efpA is an MFS transporter found in Mycobacterium tuberculosis.
	RbpA	NODE_1	733339	733670	1-332/345	96.23	85.84	card	HQ203032:1-346	RNA-polymerase binding protein which confers resistance to rifampin.
	Nocardia_rifampin_resistant_beta-subunit_of_RNA_polymerase_(rpoB2)	NODE_6	323191	326561	103-3461/3489	96.16	81.39	card	AP006618.1:4835200-4838689	Due to gene duplication the genomes of Nocardia species include both rifampin-sensitive beta-subunit of RNA polymerase (rpoB) and rifampin-resistant beta-subunit of RNA polymerase (rpoB2) genes with ~88% similarity between the two gene products. Expression of the rpoB2 variant results in replacement of rifampin sensitivity with rifampin resistance.
	mbtH	NODE_19	55076	55273	1-198/216	91.67	79.80	vfdb	NP_216893	(mbtH) putative protein MbtH [Mycobactin (VF0299)] [Mycobacterium tuberculosis H37Rv]
	ideR	NODE_1	241364	242051	1-691/693	99.28	78.87	vfdb	NP_217227	(ideR) Iron-dependent repressor and activator IdeR [IdeR (VF0300)] [Mycobacterium tuberculosis H37Rv]
	relA	NODE_1	386980	389256	85-2361/2373	95.95	82.17	vfdb	NP_217099	(relA) Probable GTP pyrophosphokinase RelA (ATP:GTP 3'-pyrophosphotransferase) (PPGPP synthetase I) ((P)PPGPP synthetase) (GTP diphosphokinase) [RelA (VF0287)] [Mycobacterium tuberculosis H37Rv]
	esxH	NODE_2	157311	157594	1-284/291	97.59	77.47	vfdb	NP_214802	(esxH) Type VII secretion system protein ESXH (10 kDa antigen) (CFP-7) (protein TB10.4) [ESX-3 (VF0521)] [Mycobacterium tuberculosis H37Rv]
	esxG	NODE_2	157594	157886	2-294/294	98.64	75.34	vfdb	NP_214801	(esxG) Type VII secretion system protein EsxG [ESX-3 (VF0521)] [Mycobacterium tuberculosis H37Rv]
	phoP	NODE_3	73657	74342	55-740/744	92.20	82.65	vfdb	NP_215271	(phoP) Possible two component system response transcriptional positive regulator PhoP [PhoP (VF0286)] [Mycobacterium tuberculosis H37Rv]
	icl	NODE_4	287022	288290	19-1287/1287	98.60	86.37	vfdb	YP_177728	(icl) Isocitrate lyase Icl (isocitrase) (isocitratase) [Isocitrate lyase (VF0253)] [Mycobacterium tuberculosis H37Rv]
P1-18	tap	NODE_6	101707	102889	31-1213/1230	96.02	79.58	card	AJ000283:620-1850	Efflux pump proteins contained within Mycobacterial genomes which confer resistance to a number of different antibiotics including aminoglycosides and tetracyclines.
	arr	NODE_10	177879	178307	4-432/432	99.31	76.46	ncbi	A7J11_00622	NAD(+)--rifampin ADP-ribosyltransferase
	tet(V)	NODE_6	236836	238064	25-1250/1260	96.98	78.99	ncbi	A7J11_00406	tetracycline efflux MFS transporter Tet(V)
	phoP	NODE_14	73885	74557	68-740/744	90.46	82.02	vfdb	NP_215271	(phoP) Possible two component system response transcriptional positive regulator PhoP [PhoP (VF0286)] [Mycobacterium tuberculosis H37Rv]
P9-22	lrfA	NODE_12	158110	159545	49-1484/1515	94.65	79.83	card	U40487.1:171-1686	lfrA is involved in the active efflux of quinolones and is found in Mycobacterium smegmatis. lfrA corresponds to 2 loci in Pseudomonas aeruginosa PAO1 and 2 loci in Pseudomonas aeruginosa LESB58.
	tap	NODE_9	115881	117063	31-1213/1230	96.18	77.60	card	AJ000283:620-1850	Efflux pump proteins contained within Mycobacterial genomes which confer resistance to a number of different antibiotics including aminoglycosides and tetracyclines.
	mbtH	NODE_1	531831	532033	2-204/216	93.98	80.30	vfdb	NP_216893	(mbtH) putative protein MbtH [Mycobactin (VF0299)] [Mycobacterium tuberculosis H37Rv]
	mbtG	NODE_1	532088	533325	1-1226/1296	94.60	75.04	vfdb	NP_216894	(mbtG) Lysine-N-oxygenase MbtG (L-lysine 6-monooxygenase) (lysine N6-hydroxylase) [Mycobactin (VF0299)] [Mycobacterium tuberculosis H37Rv]
	mbtC	NODE_1	546077	547358	13-1294/1335	95.88	76.79	vfdb	NP_216898	(mbtC) Polyketide synthetase MbtC (polyketide synthase) [Mycobactin (VF0299)] [Mycobacterium tuberculosis H37Rv]
	phoP	NODE_3	423760	424445	55-740/744	92.20	82.22	vfdb	NP_215271	(phoP) Possible two component system response transcriptional positive regulator PhoP [PhoP (VF0286)] [Mycobacterium tuberculosis H37Rv]
	eccA1	NODE_5	459926	461645	1-1720/1722	99.65	75.46	vfdb	NP_218385	(eccA1) ESX-1 type VII secretion system AAA+ ATPase EccA1 [ESX-1 (VF0315)] [Mycobacterium tuberculosis H37Rv]
	eccCa1	NODE_5	463197	465294	1-2101/2244	93.32	79.14	vfdb	NP_218387	(eccCa1) ESX-1 type VII secretion system FtsK/SpoIIIE family protein EccCa1 [ESX-1 (VF0315)] [Mycobacterium tuberculosis H37Rv]
	eccCb1	NODE_5	465565	467315	28-1775/1776	98.20	75.84	vfdb	NP_218388	(eccCb1) ESX-1 type VII secretion system FtsK/SpoIIIE family protein EccCb1 [ESX-1 (VF0315)] [Mycobacterium tuberculosis H37Rv]
	eccC3	NODE_7	228421	232318	11-3941/3993	97.27	75.56	vfdb	NP_214798	(eccC3) Type VII secretion system protein EccC3 [ESX-3 (VF0521)] [Mycobacterium tuberculosis H37Rv]
	esxH	NODE_7	234613	234896	1-284/291	96.91	75.17	vfdb	NP_214802	(esxH) Type VII secretion system protein ESXH (10 kDa antigen) (CFP-7) (protein TB10.4) [ESX-3 (VF0521)] [Mycobacterium tuberculosis H37Rv]
P9-64	tap	NODE_1	229820	231032	1-1213/1230	98.54	78.34	card	AJ000283:620-1850	Efflux pump proteins contained within Mycobacterial genomes which confer resistance to a number of different antibiotics including aminoglycosides and tetracyclines.
	efpA	NODE_4	544798	546268	116-1592/1593	92.22	79.99	card	NC_000962.3:3153039-3154632	efpA is an MFS transporter found in Mycobacterium tuberculosis.
	mtrA	NODE_6	435702	436388	1-687/687	100.00	86.03	card	AL123456.3:3626663-3627350	MtrA is a transcriptional activator of the MtrCDE multidrug efflux pump of Neisseria gonorrhoeae.
	Nocardia_rifampin_resistant_beta-subunit_of_RNA_polymerase_(rpoB2)	NODE_9	124143	127537	88-3461/3489	96.53	80.30	card	AP006618.1:4835200-4838689	Due to gene duplication the genomes of Nocardia species include both rifampin-sensitive beta-subunit of RNA polymerase (rpoB) and rifampin-resistant beta-subunit of RNA polymerase (rpoB2) genes with ~88% similarity between the two gene products. Expression of the rpoB2 variant results in replacement of rifampin sensitivity with rifampin resistance.
	tet(V)	NODE_1	394117	395286	25-1191/1260	92.54	81.81	ncbi	A7J11_00406	tetracycline efflux MFS transporter Tet(V)
	aac(2')-Ib	NODE_2	778377	778935	35-587/588	93.54	77.40	ncbi	A7J11_00101	aminoglycoside N-acetyltransferase AAC(2')-Ib
	eccA1	NODE_10	227360	229059	1-1700/1722	98.61	75.68	vfdb	NP_218385	(eccA1) ESX-1 type VII secretion system AAA+ ATPase EccA1 [ESX-1 (VF0315)] [Mycobacterium tuberculosis H37Rv]
	eccCa1	NODE_10	230567	232664	1-2101/2244	93.32	78.10	vfdb	NP_218387	(eccCa1) ESX-1 type VII secretion system FtsK/SpoIIIE family protein EccCa1 [ESX-1 (VF0315)] [Mycobacterium tuberculosis H37Rv]
	phoP	NODE_11	182548	183238	54-744/744	92.88	81.91	vfdb	NP_215271	(phoP) Possible two component system response transcriptional positive regulator PhoP [PhoP (VF0286)] [Mycobacterium tuberculosis H37Rv]
	icl	NODE_2	264855	266140	1-1286/1287	99.92	86.39	vfdb	YP_177728	(icl) Isocitrate lyase Icl (isocitrase) (isocitratase) [Isocitrate lyase (VF0253)] [Mycobacterium tuberculosis H37Rv]
